# Supplementary material for: All-cause and cause-specific mortality during and following incarceration in Brazil: a retrospective cohort study
Source: bioRxiv or medRxiv preprint supplement (doi:10.1101/2021.07.28.21261263), 2021-07-31
Supplement: Supplementary file [file media-3.pdf]

|                                              | <b>Incarcerated Men and Boys</b> | <b>Formerly Incarcerated Men and Boys</b> | <b>Incarcerated Women</b> | <b>Formerly Incarcerated Women</b> | <b>All groups</b> |
|----------------------------------------------|----------------------------------|-------------------------------------------|---------------------------|------------------------------------|-------------------|
| <b>All causes</b>                            | 672                              | 2236                                      | 33                        | 186                                | 3127              |
| <b>Interpersonal violence</b>                | 226 (33.6%)#                     | 848 (37.9%)#                              | 2 (6.1%)#                 | 31 (16.7%)#                        | 1107 (35.4%)#     |
| <b>Cardiovascular disease</b>                | 79 (11.8%)#                      | 311 (13.9%)#                              | 7 (21.2%)#                | 29 (15.6%)#                        | 426 (13.6%)#      |
| <b>Transport injuries</b>                    | 28 (4.2%)                        | 205 (9.2%)#                               | 0                         | 7 (3.8%)                           | 240 (7.7%)#       |
| <b>Neoplasms</b>                             | 24 (3.6%)                        | 139 (6.2%)#                               | 3 (9.1%)#                 | 34 (18.3%)#                        | 200 (6.4%)#       |
| <b>Suicide</b>                               | 55 (8.2%)#                       | 90 (4.0%)#                                | 3 (9.1%)#                 | 7 (3.8%)                           | 155 (5.0%)#       |
| <b>Respiratory infections (including TB)</b> | 50 (7.4%)#                       | 78 (3.5%)                                 | 0                         | 8 (4.3%)#                          | 136 (4.3%)        |
| <b>HIV/AIDS</b>                              | 30 (4.5%)#                       | 79 (3.5%)                                 | 7 (21.2%)#                | 11 (5.9%)#                         | 127 (4.1%)        |
| <b>Other/unknown causes</b>                  | 180 (26.8%)                      | 486 (21.7%)                               | 11 (33.3%)                | 59 (31.7%)                         | 736 (23.5%)       |
