# Supplementary material for: All-cause and cause-specific mortality during and following incarceration in Brazil: a retrospective cohort study
Source: bioRxiv or medRxiv preprint supplement (doi:10.1101/2021.07.28.21261263), 2021-07-31

**A****Closed Prison**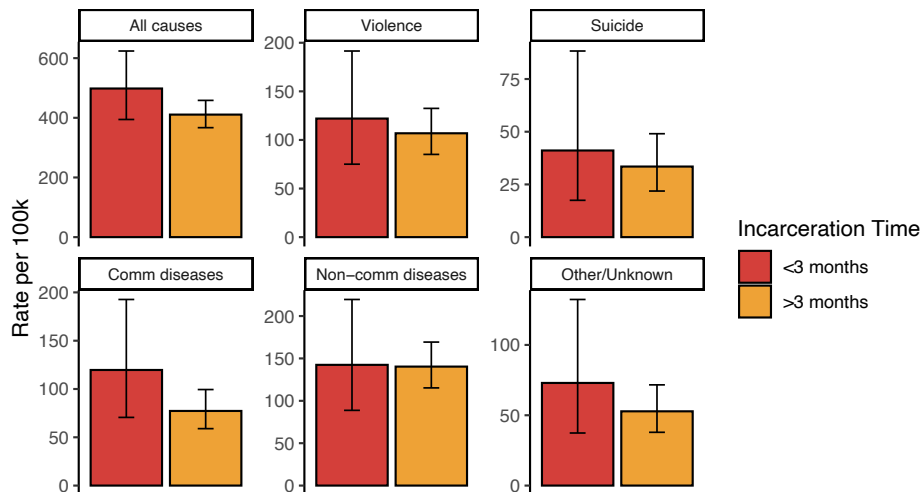**B****Semi-Open Prison**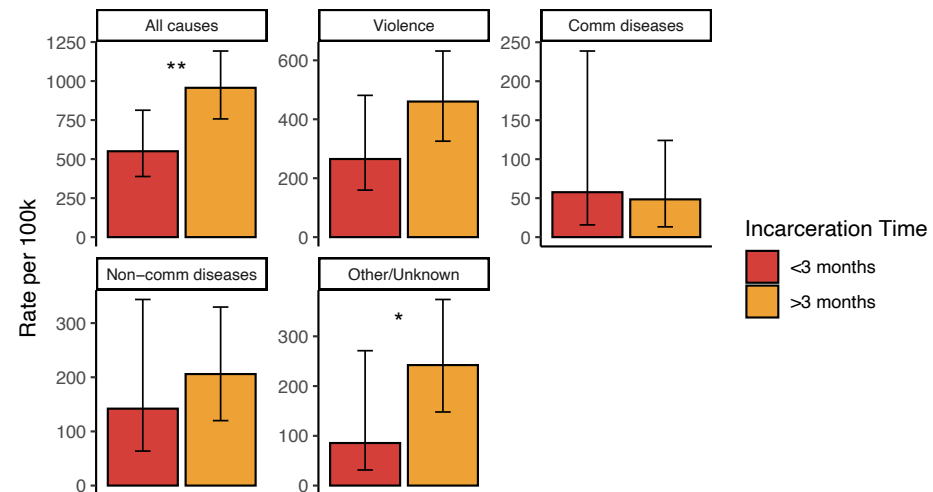**C****Police Station**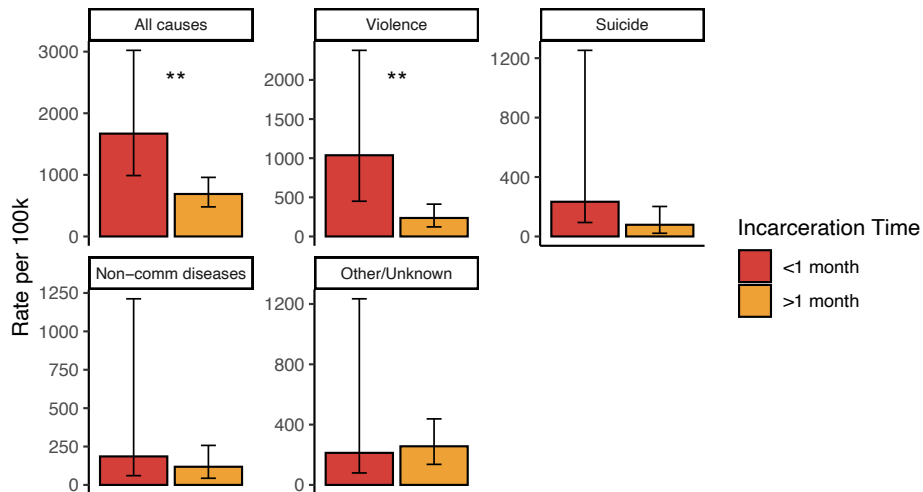**D****Youth Detention**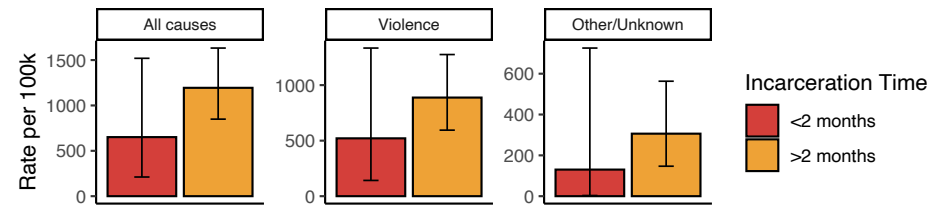

Supplement: Supplementary file [file media-12.pdf]
