# Supplementary material for: All-cause and cause-specific mortality during and following incarceration in Brazil: a retrospective cohort study
Source: bioRxiv or medRxiv preprint supplement (doi:10.1101/2021.07.28.21261263), 2021-07-31

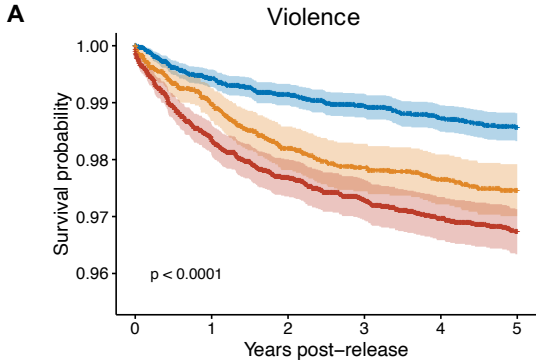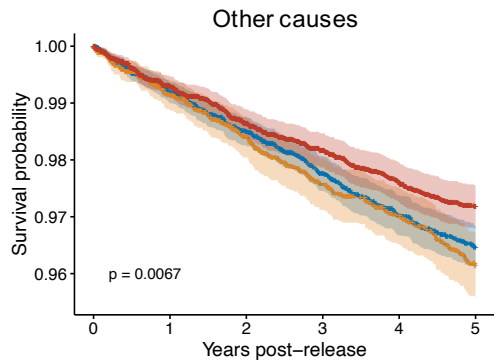

Total length of previous incarceration — 0–3 months — 3 months–1 year — over 1 year

**B**

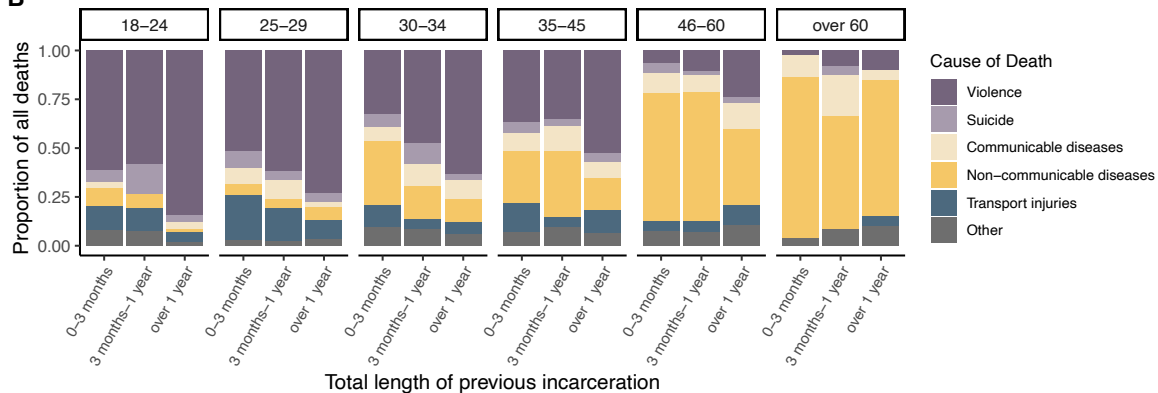

**C**

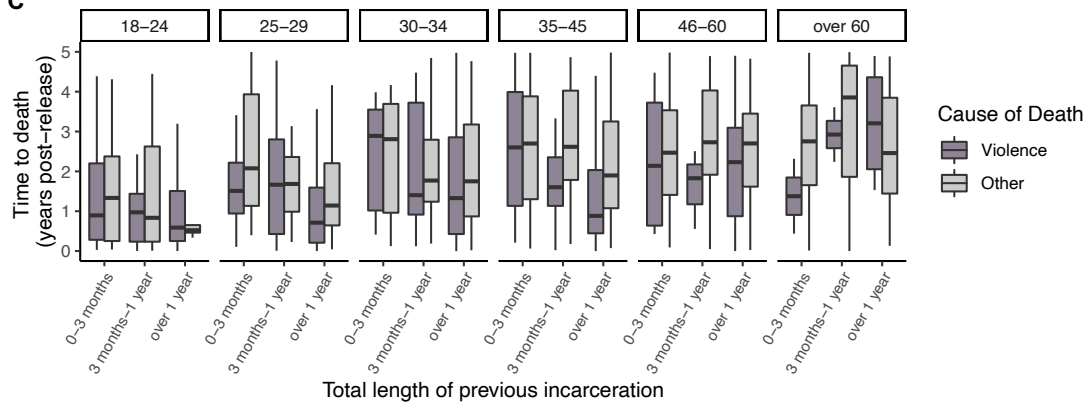

Supplement: Supplementary file [file media-14.pdf]
